# Supplementary material for: Battlement-shaped 1D coordination polymer based on a bis(N-methylimidazole-2-yl)butadiyne ligand
Source: Royal Society of Chemistry journal article supplement (doi:10.1039/c3ce41652f), 2013-01-01
Supplement: c3ce41652f.pdf [file c3ce41652f.pdf]

## Supporting Information

# Battlement shaped 1D coordination polymer, based on a bis(*N*-methylimidazol-2-yl)butadiyne ligand

Thomas Waidmann<sup>a</sup>, Nico Fritsch<sup>a</sup>, Johannes Tucher<sup>a</sup>, Marc Rudolf<sup>b</sup>, Felix Glaser<sup>a</sup>, Dirk M. Guldi<sup>b\*</sup> and Nicolai Burzlaff<sup>a\*</sup>

## Experimental Section

The synthesis of 2-iodo-1-methylimidazole (**4**) and 1-methyl-2-trimethylsilyethynylimidazole (**5**) were performed following literature procedures. <sup>1</sup>H-NMR spectra were recorded on a Bruker DPX 300 AVANCE,  $\delta$  are given values relative to the residual solvent signal (1H: CHCl<sub>3</sub>, 7.26 ppm; <sup>13</sup>C{<sup>1</sup>H}: CDCl<sub>3</sub>, 77.2 ppm). Elemental analyses were carried out on a Euro EA 3000 (Euro Vector). Infrared spectra were recorded with a EXCALIBUR FTS-3500 FT-IR spectrometer. X-Ray structure analyses were carried out on a Bruker Kappa CCD (SADABS-2008/1 (Bruker, 2008)). All calculations were carried out with the SHELX97 software package.

**2-(2-Chloroethenyl)-*N*-methylimidazole-2-yl (3a,b):** To a solution of (chloromethyl)triphenylphosphonium chloride (25.0 g, 72.0 mmol) in THF (100 mL) *n*-butyllithium (45.0 mL, 72.0 mmol, 1.60 M in hexanes) was added drop wise at 0 °C, and stirred for 1 h. Subsequently 1-methylimidazole-2-carbaldehyde (**2**) (5.00 g, 45.0 mmol) was added and stirred for 12 hours at room temperature. The yellow-brown product containing a mixture of *E/Z*-isomers was purified by column chromatography (silica, 6 × 20 cm, hexane/EtOAc 5/1 and silica 6 × 40 cm, CHCl<sub>3</sub>/MeOH 12/1) yielding a brown oil. (1.60 g, 11.2 mmol, 25 %). <sup>1</sup>H-NMR (300 MHz, CDCl<sub>3</sub>): (*E*)-2-(2-Chloroethenyl)-*N*-methylimidazole-2-yl:  $\delta$  = 3.62 (s, 3H, CH<sub>3</sub>), 6.66 (d, 1H, <sup>2</sup>*J*<sub>HH</sub> = 13.2 Hz, Cl-HC=CH-), 6.84 (s, 1H, C<sub>im</sub>), 7.00 (d, 1H, <sup>2</sup>*J*<sub>HH</sub> = 5.94 Hz, C<sub>im</sub>), 7.08 (d, 1H, <sup>2</sup>*J*<sub>HH</sub> = 13.2 Hz, Cl-HC=CH-) ppm. <sup>1</sup>H-NMR (300 MHz, CDCl<sub>3</sub>): (*Z*)-2-(2-Chloroethenyl)-*N*-methylimidazole-2-yl:  $\delta$  = 3.62 (s, 3H, CH<sub>3</sub>), 6.43 (d, 1H, <sup>2</sup>*J*<sub>HH</sub> = 8.19 Hz, Cl-HC=CH-), 6.53 (d, 1H, <sup>2</sup>*J*<sub>HH</sub> = 8.31 Hz, C<sub>im</sub>), 6.89 (s, 1H, C<sub>im</sub>), 7.20 (s, 1H, Cl-HC=CH-) ppm. IR : (KBr)  $\tilde{\nu}$  = 3047 (m), 2956 (w), 2857 (w), 1720 (s), 1615 (m), 1485 (m), 1438 (s), 1418 (m), 1363 (w), 1290 (s), 1189 (s), 1123 (m), 1120 (m) cm<sup>-1</sup>.

**2-Ethynyl-*N*-methylimidazole-2-yl (6): Route A** - A Schlenk flask was charged with 1-methyl-2-trimethylsilyethynylimidazole (**5**) (490 mg, 2.75 mmol) and MeOH (25 mL). After the addition of KOH (13.4 M, 2 mL) the reaction mixture was stirred 2 h. The mixture was diluted with water (100 mL), extracted with CHCl<sub>3</sub> (4 × 50 mL) and dried over Na<sub>2</sub>SO<sub>4</sub>. The solvent was removed by rotary evaporator and the crude product was purified by column chromatography (silica, 4 × 5 cm, EtOAc/hexane 3/1) to give yellow oil (254 mg, 2.39 mmol, 87 %). Characterization see below. **Route B** - A round bottom flask was charged with 2-(2-chloroethenyl)-*N*-methylimidazol-2-yl (**3a,b**) (400 mg, 2.80 mmol) in dried THF (10 mL), and potassium-*tert*-butoxide (670 mg, 59.0 mmol) in THF (10 mL) was added at 0 °C. The mixture was stirred for 12 hours at room temperature. Afterwards the mixture was poured on ice water and neutralized with a solution of ammonium chloride (20%). The brown mixture was extracted with CH<sub>2</sub>Cl<sub>2</sub> (4 × 50 mL), dried over Na<sub>2</sub>SO<sub>4</sub>. The solvent was removed by rotary evaporator. The product was purified by column chromatography (silica 3 × 30cm, CHCl<sub>3</sub>/MeOH/Et<sub>3</sub>N, 12/1/1) to yield a yellow-brown oil (90.0 mg 0.80 mmol, 28.5%). <sup>1</sup>H-NMR (300 MHz, CDCl<sub>3</sub>):  $\delta$  = 3.31 (s, 1H, HC≡C-), 3.73 (s, 3H, CH<sub>3</sub>), 6.89 (s, 1H, C<sub>im</sub>) 7.02 (s, 1H, C<sub>im</sub>) ppm. <sup>13</sup>C{<sup>1</sup>H}-NMR (300 MHz, CDCl<sub>3</sub>):  $\delta$  = 33.7 (CH<sub>3</sub>), 72.2 (HC≡C-), 73.1 (HC≡C-), 128.4 (C<sub>im</sub>), 129.5 (C<sub>im</sub>), 130.5 (C<sub>im</sub>) ppm.

**Bis(*N*-methylimidazol-2-yl)butadiyne (bmib) (7):** CuCl (0.049 g, 0.500 mmol) in pyridine (3 mL) was reacted with 2-ethynyl-*N*-methylimidazole (**6**) (0.530 g, 5.00 mmol) under oxygen atmosphere for 1.5 h at 45 °C. Pyridine was removed in vacuum, the brown residue was washed with aqueous NH<sub>4</sub>Cl solution (10%, 70 mL), and extracted with CH<sub>2</sub>Cl<sub>2</sub> (3 × 100 mL). The combined organic phases were washed (sat. NH<sub>4</sub>Cl solution), and dried (MgSO<sub>4</sub>). Solvent was removed and the product was purified by column chromatography (silica,  $\emptyset$  = 3 cm, 30 cm, CHCl<sub>3</sub>/MeOH/Et<sub>3</sub>N, 12/1/1, v/v/v) to yield a yellow-brown powder. Crystals suitable for X-Ray diffraction analysis were obtained by slow evaporation from a solution of **7** in acetone. Yield (0.490 g, 2.33 mmol, 93%). <sup>1</sup>H-NMR (300 MHz, CDCl<sub>3</sub>):  $\delta$  = 3.70 (s, 3H, CH<sub>3</sub>), 6.89 (s, 1H, C<sub>im</sub>), 7.03 (s, 1H, C<sub>im</sub>) ppm. <sup>13</sup>C{<sup>1</sup>H}-NMR (300 MHz, acetone-d<sub>6</sub>):  $\delta$  = 33.9 (CH<sub>3</sub>), 73.7 (-C≡C-C≡C-), 76.5 ((-C≡C-C≡C-), 124.6 (C<sub>im</sub>), 131.0 (C<sub>im</sub>), 132.2 (C<sub>im</sub>) ppm. C<sub>12</sub>H<sub>10</sub>N<sub>4</sub> (210.09 g/mol): calculated C: 68.56; H: 4.79; N: 26.65, found C: 68.96; H: 4.43; N: 27.21. ESI/TOF MS (MeOH): m/z (%) = 443.1702 (100) [2 × M + Na]<sup>+</sup>. IR: (KBr)  $\tilde{\nu}$  = 2153 (w), 1709 (w), 1619 (w), 1509 (s), 1477 (s), 1454 (m), 1445 (m), 1415 (m), 1401 (m), 1388 (m), 1355 (m),

1287 (s), 1192 (m), 1150 (m), 1139 (m), 1083 (w), 1046 (w), 921 (w), 911 (w), 863 (w), 771(w), 754 (s), 697(w), 691(w), 623 (w), 598 (w), 537 (w)  $\text{cm}^{-1}$ .

**[Zn<sub>5</sub>(OAc)<sub>10</sub>(bmib)<sub>2</sub>]<sub>n</sub> (8):** A solution of bmib (50.0 mg, 0.236 mmol) in MeCN was layered with a solution of Zn(OAc)<sub>2</sub> in THF (35 mL). By slow evaporation of the solvents, single crystals suitable for X-Ray diffraction analysis were obtained after three days.

**Steady-state absorption:** Absorption spectra of all samples were recorded with a Lambda 2 UV/Vis-spectrometer from Perkin Elmer (190 to 1100 nm; double-beam-instrument) using a quartz cell and 0.5 nm resolution.

**Steady-state emission:** The spectra were recorded on a FluoroMax 3 fluorometer built by HORIBA JobinYvon.

**Time resolved absorption:** Femtosecond transient absorption studies were performed with 258 nm laser pulses (1 kHz, 150 fs pulse width) from an amplified Ti:Sapphire laser system (model CPA 2101, Clark-MXR Inc.) in the TAPPS, transient absorption pump/probe system, Helios from Ultrafast Systems with 1  $\mu\text{J}$  laser energy. Nanosecond laser flash photolysis experiments were performed with 266 nm laser pulses from a Brilliant CDR Nd:YAG system (4 ns pulse width, Quantel) in a front face excitation geometry with 5 mJ laser energy.

Crystallographic data for **7**. C<sub>12</sub>H<sub>10</sub>N<sub>4</sub>, M = 210.24, monoclinic, *P*2<sub>1</sub>/*c*, *a* = 7.0586(4), *b* = 12.6096(4), *c* = 12.8621(7) Å,  $\beta$  = 92.413(5)°, *V* = 1053.08(9) Å<sup>3</sup>, *T* = 153(2) K, *Z* = 4,  $\mu(\text{Mo-K}\alpha)$  = 0.085 mm<sup>-1</sup>, 14414 data collected, 2146 independent reflections (*R*<sub>int</sub> = 0.0230). Final *R*<sub>1</sub> [*I* > 2 $\sigma$ (*I*)] = 0.0387, *wR*<sub>2</sub>[all data] = 0.0993. CCDC 949213. Crystallographic data for **8**. C<sub>22</sub>H<sub>25</sub>N<sub>4</sub>O<sub>10</sub>Zn<sub>2.5</sub>, M = 668.89, triclinic, *P*-1, *a* = 8.0568(10), *b* = 10.3125(10), *c* = 16.0151(16) Å,  $\alpha$  = 98.594(8),  $\beta$  = 94.875(9),  $\gamma$  = 93.583(9)°, *V* = 1307.1(2) Å<sup>3</sup>, *T* = 153(2) K, *Z* = 2,  $\mu(\text{Mo-K}\alpha)$  = 2.344 mm<sup>-1</sup>, 13144 data collected, 5321 independent reflections (*R*<sub>int</sub> = 0.0743). Final *R*<sub>1</sub> [*I* > 2 $\sigma$ (*I*)] = 0.0530, *wR*<sub>2</sub>[all data] = 0.1285. CCDC 949214.

#-----  
#SUBMISSION INFORMATION  
#  
# For a journal send the form to the address specified by the journal  
#  
# For a private communication to the CCDC send the form to the address  
# deposit@ccdc.cam.ac.uk  
#  
# For up-to-date information on deposition procedures, check the website  
# <http://www.ccdc.cam.ac.uk/>

# 1. SUBMISSION DETAILS

\_publ\_contact\_author  
;  
Prof. Dr. Nicolai Burzlaff  
Department of Chemistry and Pharmacy  
University of Erlangen-N\urnberg  
Egerlandstrasse 1  
D-91058 Erlangen  
Germany  
;  
\_publ\_contact\_author\_phone 49(9131)8528976  
\_publ\_contact\_author\_fax 49(9131)8527387  
\_publ\_contact\_author\_email burzlaff@chemie.uni-erlangen.de  
\_publ\_requested\_journal 'Chem. Commun.'  
\_publ\_requested\_coeditor\_name ?

\_publ\_contact\_letter  
;  
Please consider this CIF submission (2 compounds) for structural data  
deposition. We are awaiting a notice about the assigned CSD numbers.  
;

#-----

# 2. TITLE AND AUTHOR LIST

\_publ\_section\_title  
;  
Battlement shaped 1D coordination polymer, based on a  
bis(N-methyl-imidazol-2-yl)butadiyne ligand  
;

loop\_  
\_publ\_author\_name  
\_publ\_author\_address  
'Waidmann, Thomas'  
;  
Department of Chemistry and Pharmacy  
University of Erlangen-N\urnberg  
Egerlandstrasse 1  
D-91058 Erlangen  
Germany  
;  
'Fritsch, Nico'  
;  
Department of Chemistry and Pharmacy  
University of Erlangen-N\urnberg  
Egerlandstrasse 1  
D-91058 Erlangen  
Germany  
;  
'Tucher, Johannes'  
;  
Department of Chemistry and Pharmacy  
University of Erlangen-N\urnberg  
Egerlandstrasse 1  
D-91058 Erlangen

Germany  
;  
'Rudolf, Marc'  
;  
Department of Chemistry and Pharmacy  
University of Erlangen-N\urnberg  
Egerlandstrasse 3  
D-91058 Erlangen  
Germany  
;  
'Glaser, Felix'  
;  
Department of Chemistry and Pharmacy  
University of Erlangen-N\urnberg  
Egerlandstrasse 1  
D-91058 Erlangen  
Germany  
;  
'Guldi, Dirk'  
;  
Department of Chemistry and Pharmacy  
University of Erlangen-N\urnberg  
Egerlandstrasse 3  
D-91058 Erlangen  
Germany  
;  
'Burzlaff, Nicolai'  
;  
Department of Chemistry and Pharmacy  
University of Erlangen-N\urnberg  
Egerlandstrasse 1  
D-91058 Erlangen  
Germany  
;

#-----

data\_compound7

\_audit\_creation\_date 2013-06-28T11:59:27-00:00  
\_audit\_creation\_method 'WinGX routine CIF\_UPDATE'

#-----#

# CHEMICAL INFORMATION #

#-----#

\_chemical\_name\_systematic

;

?

;

\_chemical\_formula\_moiety 'C12 H10 N4'  
\_chemical\_formula\_sum 'C12 H10 N4'  
\_chemical\_formula\_weight 210.24  
\_chemical\_compound\_source 'synthesis as described'

#-----#

# UNIT CELL INFORMATION #

#-----#

\_symmetry\_cell\_setting monoclinic  
\_symmetry\_space\_group\_name\_H-M 'P 21/c'  
\_symmetry\_space\_group\_name\_Hall '-P 2ybc'  
\_symmetry\_Int\_Tables\_number 14

loop\_

\_symmetry\_equiv\_pos\_as\_xyz

'x, y, z'

'-x, y+1/2, -z+1/2'

'-x, -y, -z'

'x, -y-1/2, z-1/2'

|                               |            |
|-------------------------------|------------|
| _cell_length_a                | 7.0586(4)  |
| _cell_length_b                | 11.6096(4) |
| _cell_length_c                | 12.8621(7) |
| _cell_angle_alpha             | 90         |
| _cell_angle_beta              | 92.413(5)  |
| _cell_angle_gamma             | 90         |
| _cell_volume                  | 1053.08(9) |
| _cell_formula_units_Z         | 4          |
| _cell_measurement_temperature | 150(2)     |
| _cell_measurement_reflns_used | 89         |
| _cell_measurement_theta_min   | 6          |
| _cell_measurement_theta_max   | 20         |
| _cell_measurement_wavelength  | 0.71073    |

#-----#

# CRYSTAL INFORMATION #

#-----#

|                               |                |
|-------------------------------|----------------|
| _exptl_crystal_description    | block          |
| _exptl_crystal_colour         | yellow         |
| _exptl_crystal_size_max       | 0.37           |
| _exptl_crystal_size_mid       | 0.184          |
| _exptl_crystal_size_min       | 0.158          |
| _exptl_crystal_density_diffn  | 1.326          |
| _exptl_crystal_density_method | 'not measured' |
| _exptl_crystal_F_000          | 440            |
| _exptl_special_details        |                |
| ;                             |                |
| ?                             |                |
| ;                             |                |

#-----#

# ABSORPTION CORRECTION #

#-----#

|                                 |                            |
|---------------------------------|----------------------------|
| _exptl_absorpt_coefficient_mu   | 0.085                      |
| _exptl_absorpt_correction_type  | multi-scan                 |
| _exptl_absorpt_process_details  | 'SADABS, Bruker-AXS, 2002' |
| _exptl_absorpt_correction_T_min | 0.6921                     |
| _exptl_absorpt_correction_T_max | 0.7454                     |

#-----#

# DATA COLLECTION #

#-----#

|                                 |                          |
|---------------------------------|--------------------------|
| _diffn_ambient_temperature      | 150(2)                   |
| _diffn_radiation_wavelength     | 0.71073                  |
| _diffn_radiation_type           | MoK\alpha                |
| _diffn_radiation_monochromator  | graphite                 |
| _diffn_radiation_probe          | x-ray                    |
| _diffn_detector_area_resol_mean | 9                        |
| _diffn_measurement_device_type  | 'Bruker-Nonius KappaCCD' |
| _diffn_measurement_method       |                          |
| ;                               |                          |

\f- and \w-rotations with 1.60 \% and 192 sec per frame

|                                |       |
|--------------------------------|-------|
| _diffn_reflns_av_R_equivalents | 0.023 |
| _diffn_reflns_av_unetl/netl    | 0.014 |
| _diffn_reflns_number           | 14414 |
| _diffn_reflns_limit_h_min      | -8    |
| _diffn_reflns_limit_h_max      | 8     |
| _diffn_reflns_limit_k_min      | -14   |
| _diffn_reflns_limit_k_max      | 14    |
| _diffn_reflns_limit_l_min      | -16   |
| _diffn_reflns_limit_l_max      | 16    |
| _diffn_reflns_theta_min        | 6.25  |

```
_diffn_refl_theta_max          26.5
_diffn_refl_theta_full         26.5
_diffn_measured_fraction_theta_full
                                0.986
_diffn_measured_fraction_theta_max
                                0.986
_reflns_number_total           2146
_reflns_number_gt              1914
_reflns_threshold_expression    >2sigma(I)

#-----#
#          COMPUTER PROGRAMS USED          #
#-----#

_computing_data_collection      'COLLECT (Bruker-Nonius, 2002)'
_computing_cell_refinement      'EVALCCD (Duisenberg, 2003)'
_computing_data_reduction       'EVALCCD (Duisenberg, 2003)'
_computing_structure_solution   'SHELXS-86 (Sheldrick, 1986)'
_computing_structure_refinement 'SHELXL-97 (Sheldrick, 1997)'
_computing_molecular_graphics   'Ortep-3 for Windows (Farrugia, 1997)'
_computing_publication_material
                                'WinGX publication routines (Farrugia, 1999)'

#-----#
#          REFINEMENT INFORMATION          #
#-----#

_refine_special_details
;
Refinement of F2 against ALL reflections. The weighted R-factor wR and
goodness of fit S are based on F2, conventional R-factors R are based
on F, with F set to zero for negative F2. The threshold expression of
F2 > 2sigma(F2) is used only for calculating R-factors(gt) etc. and is
not relevant to the choice of reflections for refinement. R-factors based
on F2 are statistically about twice as large as those based on F, and R-
factors based on ALL data will be even larger.
;
_refine_ls_structure_factor_coef      Fsqd
_refine_ls_matrix_type                full
_refine_ls_weighting_scheme           calc
_refine_ls_weighting_details
    'calc w=1/[\s^2*(Fo^2)+(0.0456P)^2+0.4547P] where P=(Fo^2+2Fc^2)/3'
_atom_sites_solution_primary          direct
_atom_sites_solution_secondary        difmap
_atom_sites_solution_hydrogens        geom
_refine_ls_hydrogen_treatment         constr
_refine_ls_extinction_method          none
_refine_ls_number_reflns              2146
_refine_ls_number_parameters          147
_refine_ls_number_restraints          0
_refine_ls_R_factor_all                0.0443
_refine_ls_R_factor_gt                 0.0387
_refine_ls_wR_factor_ref               0.0993
_refine_ls_wR_factor_gt                0.0958
_refine_ls_goodness_of_fit_ref         1.068
_refine_ls_restrained_S_all            1.068
_refine_ls_shift/su_max                0
_refine_ls_shift/su_mean                0
_refine_diff_density_max                0.285
_refine_diff_density_min               -0.222
_refine_diff_density_rms                0.037

#-----#
#          ATOMIC TYPES, COORDINATES AND THERMAL PARAMETERS          #
#-----#

loop_
  _atom_type_symbol
```

\_atom\_type\_description  
\_atom\_type\_scatter\_dispersion\_real  
\_atom\_type\_scatter\_dispersion\_imag  
\_atom\_type\_scatter\_source  
C C 0.0033 0.0016 'International Tables Vol C Tables 4.2.6.8 and 6.1.1.4'  
H H 0 0 'International Tables Vol C Tables 4.2.6.8 and 6.1.1.4'  
N N 0.0061 0.0033 'International Tables Vol C Tables 4.2.6.8 and 6.1.1.4'

loop\_  
\_atom\_site\_label  
\_atom\_site\_type\_symbol  
\_atom\_site\_fract\_x  
\_atom\_site\_fract\_y  
\_atom\_site\_fract\_z  
\_atom\_site\_U\_iso\_or\_equiv  
\_atom\_site\_adp\_type  
\_atom\_site\_occupancy  
\_atom\_site\_symmetry\_multiplicity  
\_atom\_site\_calc\_flag  
\_atom\_site\_refinement\_flags  
\_atom\_site\_disorder\_assembly  
\_atom\_site\_disorder\_group  
C1 C 0.18554(17) 0.64825(11) 0.53301(10) 0.0218(3) Uani 1 1 d . . .  
C2 C 0.22584(17) 0.56073(11) 0.48919(10) 0.0218(3) Uani 1 1 d . . .  
C3 C 0.27293(17) 0.46293(11) 0.43701(10) 0.0214(3) Uani 1 1 d . . .  
C4 C 0.31627(17) 0.37864(11) 0.38930(9) 0.0217(3) Uani 1 1 d . . .  
C11 C 0.13725(17) 0.75229(11) 0.58303(9) 0.0192(3) Uani 1 1 d . . .  
C12 C 0.06006(18) 0.87078(11) 0.70561(10) 0.0227(3) Uani 1 1 d . . .  
H12 H 0.0304 0.9023 0.7694 0.027 Uiso 1 1 calc R . .  
C13 C 0.06586(19) 0.92696(11) 0.61323(10) 0.0243(3) Uani 1 1 d . . .  
H13 H 0.0403 1.0049 0.6039 0.029 Uiso 1 1 calc R . .  
C14 C 0.1154(2) 0.66564(12) 0.76171(11) 0.0301(3) Uani 1 1 d . . .  
H14A H -0.0108 0.6437 0.7786 0.045 Uiso 1 1 calc R . .  
H14B H 0.1839 0.6907 0.8237 0.045 Uiso 1 1 calc R . .  
H14C H 0.1789 0.6008 0.7326 0.045 Uiso 1 1 calc R . .  
C21 C 0.36786(17) 0.28038(11) 0.33160(10) 0.0209(3) Uani 1 1 d . . .  
C22 C 0.44779(18) 0.10325(11) 0.29782(10) 0.0256(3) Uani 1 1 d . . .  
H22 H 0.4792 0.0257 0.3037 0.031 Uiso 1 1 calc R . .  
C23 C 0.4393(2) 0.16719(13) 0.20951(11) 0.0301(3) Uani 1 1 d . . .  
H23 H 0.4641 0.139 0.1438 0.036 Uiso 1 1 calc R . .  
C24 C 0.3899(2) 0.14708(12) 0.48572(10) 0.0272(3) Uani 1 1 d . . .  
H24A H 0.3437 0.0698 0.4926 0.041 Uiso 1 1 calc R . .  
H24B H 0.3049 0.1996 0.5177 0.041 Uiso 1 1 calc R . .  
H24C H 0.5135 0.1532 0.5192 0.041 Uiso 1 1 calc R . .  
N11 N 0.11426(16) 0.85349(9) 0.53599(8) 0.0239(3) Uani 1 1 d . . .  
N12 N 0.10631(14) 0.75914(9) 0.68633(8) 0.0198(2) Uani 1 1 d . . .  
N21 N 0.38958(17) 0.27852(10) 0.22980(9) 0.0285(3) Uani 1 1 d . . .  
N22 N 0.40109(14) 0.17538(9) 0.37607(8) 0.0205(2) Uani 1 1 d . . .

loop\_  
\_atom\_site\_aniso\_label  
\_atom\_site\_aniso\_U\_11  
\_atom\_site\_aniso\_U\_22  
\_atom\_site\_aniso\_U\_33  
\_atom\_site\_aniso\_U\_23  
\_atom\_site\_aniso\_U\_13  
\_atom\_site\_aniso\_U\_12  
C1 0.0222(6) 0.0203(6) 0.0230(6) 0.0007(5) 0.0019(5) 0.0009(5)  
C2 0.0236(6) 0.0195(6) 0.0223(6) 0.0012(5) 0.0024(5) 0.0010(5)  
C3 0.0231(6) 0.0198(6) 0.0214(6) 0.0009(5) 0.0018(5) 0.0013(5)  
C4 0.0224(6) 0.0216(6) 0.0212(6) 0.0012(5) 0.0019(5) 0.0016(5)  
C11 0.0202(6) 0.0181(6) 0.0195(6) 0.0002(5) 0.0014(4) 0.0007(4)  
C12 0.0278(6) 0.0205(6) 0.0199(6) -0.0041(5) 0.0025(5) 0.0024(5)  
C13 0.0318(7) 0.0165(6) 0.0248(7) -0.0006(5) 0.0030(5) 0.0045(5)  
C14 0.0401(8) 0.0254(7) 0.0247(7) 0.0099(6) 0.0015(6) 0.0008(6)  
C21 0.0214(6) 0.0204(6) 0.0211(6) -0.0013(5) 0.0020(5) 0.0024(5)  
C22 0.0256(6) 0.0212(6) 0.0302(7) -0.0071(5) 0.0018(5) 0.0038(5)  
C23 0.0351(7) 0.0324(7) 0.0230(7) -0.0082(6) 0.0034(5) 0.0085(6)

C24 0.0322(7) 0.0261(7) 0.0236(7) 0.0035(5) 0.0046(5) 0.0017(5)  
N11 0.0321(6) 0.0190(5) 0.0208(5) 0.0017(4) 0.0044(4) 0.0046(4)  
N12 0.0240(5) 0.0176(5) 0.0178(5) 0.0017(4) 0.0010(4) -0.0005(4)  
N21 0.0356(6) 0.0291(6) 0.0211(6) -0.0011(5) 0.0048(5) 0.0082(5)  
N22 0.0215(5) 0.0185(5) 0.0216(5) -0.0015(4) 0.0011(4) 0.0008(4)

#-----#  
# MOLECULAR GEOMETRY #  
#-----#

\_geom\_special\_details

;  
All esds (except the esd in the dihedral angle between two l.s. planes)  
are estimated using the full covariance matrix. The cell esds are taken  
into account individually in the estimation of esds in distances, angles  
and torsion angles; correlations between esds in cell parameters are only  
used when they are defined by crystal symmetry. An approximate (isotropic)  
treatment of cell esds is used for estimating esds involving l.s. planes.

;

loop\_

\_geom\_bond\_atom\_site\_label\_1  
\_geom\_bond\_atom\_site\_label\_2  
\_geom\_bond\_distance  
\_geom\_bond\_site\_symmetry\_2  
\_geom\_bond\_publ\_flag

C1 C2 1.2019(18) . ?  
C1 C11 1.4169(17) . ?  
C2 C3 1.3671(17) . ?  
C3 C4 1.2014(18) . ?  
C4 C21 1.4168(17) . ?  
C11 N11 1.3284(16) . ?  
C11 N12 1.3579(16) . ?  
C12 C13 1.3576(18) . ?  
C12 N12 1.3620(16) . ?  
C13 N11 1.3638(16) . ?  
C14 N12 1.4550(16) . ?  
C21 N21 1.3249(17) . ?  
C21 N22 1.3627(16) . ?  
C22 C23 1.356(2) . ?  
C22 N22 1.3605(16) . ?  
C23 N21 1.3673(18) . ?  
C24 N22 1.4535(17) . ?

loop\_

\_geom\_angle\_atom\_site\_label\_1  
\_geom\_angle\_atom\_site\_label\_2  
\_geom\_angle\_atom\_site\_label\_3  
\_geom\_angle  
\_geom\_angle\_site\_symmetry\_1  
\_geom\_angle\_site\_symmetry\_3  
\_geom\_angle\_publ\_flag

C2 C1 C11 179.03(13) . . ?  
C1 C2 C3 178.43(14) . . ?  
C4 C3 C2 178.38(14) . . ?  
C3 C4 C21 179.06(13) . . ?  
N11 C11 N12 111.86(11) . . ?  
N11 C11 C1 125.05(11) . . ?  
N12 C11 C1 123.08(11) . . ?  
C13 C12 N12 106.35(11) . . ?  
C12 C13 N11 110.78(11) . . ?  
N21 C21 N22 112.04(11) . . ?  
N21 C21 C4 125.02(12) . . ?  
N22 C21 C4 122.95(11) . . ?  
C23 C22 N22 106.21(11) . . ?  
C22 C23 N21 111.11(12) . . ?  
C11 N11 C13 104.53(10) . . ?  
C11 N12 C12 106.47(10) . . ?



C11 N12 C14 127.15(11) . . ?  
C12 N12 C14 126.36(11) . . ?  
C21 N21 C23 104.21(11) . . ?  
C22 N22 C21 106.43(11) . . ?  
C22 N22 C24 127.12(11) . . ?  
C21 N22 C24 126.45(11) . . ?

#-----#

data\_compound8

\_audit\_creation\_date 2013-06-28T11:26:43-00:00  
\_audit\_creation\_method 'WinGX routine CIF\_UPDATE'

#-----#

# CHEMICAL INFORMATION #

#-----#

\_chemical\_name\_systematic

;

?

;

\_chemical\_formula\_moiety 'C44 H50 N8 O20 Zn5'  
\_chemical\_formula\_sum 'C44 H50 N8 O20 Zn5'  
\_chemical\_formula\_weight 1337.87  
\_chemical\_compound\_source 'synthesis as described'

#-----#

# UNIT CELL INFORMATION #

#-----#

\_symmetry\_cell\_setting triclinic  
\_symmetry\_space\_group\_name\_H-M 'P -1'  
\_symmetry\_space\_group\_name\_Hall '-P 1'  
\_symmetry\_Int\_Tables\_number 2  
loop\_  
\_symmetry\_equiv\_pos\_as\_xyz  
'x, y, z'  
'-x, -y, -z'

\_cell\_length\_a 8.0568(10)  
\_cell\_length\_b 10.3125(10)  
\_cell\_length\_c 16.0151(16)  
\_cell\_angle\_alpha 98.594(8)  
\_cell\_angle\_beta 94.875(9)  
\_cell\_angle\_gamma 93.583(9)  
\_cell\_volume 1307.1(2)  
\_cell\_formula\_units\_Z 1  
\_cell\_measurement\_temperature 150(2)  
\_cell\_measurement\_reflns\_used 51  
\_cell\_measurement\_theta\_min 6  
\_cell\_measurement\_theta\_max 20  
\_cell\_measurement\_wavelength 0.71073

#-----#

# CRYSTAL INFORMATION #

#-----#

\_exptl\_crystal\_description block  
\_exptl\_crystal\_colour brown  
\_exptl\_crystal\_size\_max 0.15  
\_exptl\_crystal\_size\_mid 0.103  
\_exptl\_crystal\_size\_min 0.056  
\_exptl\_crystal\_density\_diffn 1.700  
\_exptl\_crystal\_density\_method 'not measured'  
\_exptl\_crystal\_F\_000 680  
\_exptl\_special\_details  
;

```
?  
;  
  
#-----#  
#           ABSORPTION CORRECTION           #  
#-----#  
  
_exptl_absorpt_coefficient_mu      2.344  
_exptl_absorpt_correction_type     multi-scan  
_exptl_absorpt_process_details     'SADABS, Bruker-AXS, 2002'  
_exptl_absorpt_correction_T_min    0.5815  
_exptl_absorpt_correction_T_max    0.7454  
  
#-----#  
#           DATA COLLECTION                 #  
#-----#  
  
_diffrn_ambient_temperature        150(2)  
_diffrn_radiation_wavelength        0.71073  
_diffrn_radiation_type              MoK\alpha  
_diffrn_radiation_monochromator      graphite  
_diffrn_radiation_probe              x-ray  
_diffrn_detector_area_resol_mean     9  
_diffrn_measurement_device_type      'Bruker-Nonius KappaCCD'  
_diffrn_measurement_method  
;  
\f- and \w-rotations with 1.60 \% and 192 sec per frame  
;  
_diffrn_reflns_av_R_equivalents      0.0743  
_diffrn_reflns_av_unetl/netl         0.1017  
_diffrn_reflns_number                 13144  
_diffrn_reflns_limit_h_min            -10  
_diffrn_reflns_limit_h_max            10  
_diffrn_reflns_limit_k_min            -12  
_diffrn_reflns_limit_k_max            11  
_diffrn_reflns_limit_l_min            -20  
_diffrn_reflns_limit_l_max            19  
_diffrn_reflns_theta_min              6.24  
_diffrn_reflns_theta_max              26.5  
_diffrn_reflns_theta_full              26.5  
_diffrn_measured_fraction_theta_full  0.985  
  
_diffrn_measured_fraction_theta_max  0.985  
  
_reflns_number_total                  5321  
_reflns_number_gt                     3632  
_reflns_threshold_expression           >2sigma(I)  
  
#-----#  
#           COMPUTER PROGRAMS USED          #  
#-----#  
  
_computing_data_collection            'COLLECT (Bruker-Nonius, 2002)'  
_computing_cell_refinement            'EVALCCD (Duisenberg, 2003)'  
_computing_data_reduction             'EVALCCD (Duisenberg, 2003)'  
_computing_structure_solution          'SHELXS-86 (Sheldrick, 1986)'  
_computing_structure_refinement        'SHELXL-97 (Sheldrick, 1997)'  
_computing_molecular_graphics          'Ortep-3 for Windows (Farrugia, 1997)'  
_computing_publication_material  
  
_computing_publication_material        'WinGX publication routines (Farrugia, 1999)'  
  
#-----#  
#           REFINEMENT INFORMATION         #  
#-----#  
  
_refine_special_details  
;  
Refinement of F2 against ALL reflections. The weighted R-factor wR and
```

goodness of fit  $S$  are based on  $F^2$ , conventional R-factors  $R$  are based on  $F$ , with  $F$  set to zero for negative  $F^2$ . The threshold expression of  $F^2 > 2\sigma(F^2)$  is used only for calculating R-factors(gt) etc. and is not relevant to the choice of reflections for refinement. R-factors based on  $F^2$  are statistically about twice as large as those based on  $F$ , and R-factors based on ALL data will be even larger.

```
;
_refine_ls_structure_factor_coef      Fsqd
_refine_ls_matrix_type                full
_refine_ls_weighting_scheme           calc
_refine_ls_weighting_details
      'calc w=1/[\s^2*(Fo^2)+(0.0500P)^2+0.3497P] where P=(Fo^2+2Fc^2)/3'
_atom_sites_solution_primary          direct
_atom_sites_solution_secondary        difmap
_atom_sites_solution_hydrogens        geom
_refine_ls_hydrogen_treatment         constr
_refine_ls_extinction_method          none
_refine_ls_number_reflns              5321
_refine_ls_number_parameters          356
_refine_ls_number_restraints          0
_refine_ls_R_factor_all               0.0931
_refine_ls_R_factor_gt               0.053
_refine_ls_wR_factor_ref              0.1285
_refine_ls_wR_factor_gt              0.1122
_refine_ls_goodness_of_fit_ref        1.015
_refine_ls_restrained_S_all          1.015
_refine_ls_shift/su_max               0
_refine_ls_shift/su_mean              0
_refine_diff_density_max              0.618
_refine_diff_density_min              -0.711
_refine_diff_density_rms              0.119

#-----#
#          ATOMIC TYPES, COORDINATES AND THERMAL PARAMETERS          #
#-----#

loop_
  _atom_type_symbol
  _atom_type_description
  _atom_type_scatter_dispersion_real
  _atom_type_scatter_dispersion_imag
  _atom_type_scatter_source
C C 0.0033 0.0016 'International Tables Vol C Tables 4.2.6.8 and 6.1.1.4'
H H 0 0 'International Tables Vol C Tables 4.2.6.8 and 6.1.1.4'
N N 0.0061 0.0033 'International Tables Vol C Tables 4.2.6.8 and 6.1.1.4'
O O 0.0106 0.006 'International Tables Vol C Tables 4.2.6.8 and 6.1.1.4'
Zn Zn 0.2839 1.4301 'International Tables Vol C Tables 4.2.6.8 and 6.1.1.4'

loop_
  _atom_site_label
  _atom_site_type_symbol
  _atom_site_fract_x
  _atom_site_fract_y
  _atom_site_fract_z
  _atom_site_U_iso_or_equiv
  _atom_site_adp_type
  _atom_site_occupancy
  _atom_site_symmetry_multiplicity
  _atom_site_calc_flag
  _atom_site_refinement_flags
  _atom_site_disorder_assembly
  _atom_site_disorder_group
C1 C -0.2924(7) 0.0679(4) -0.0085(3) 0.0273(12) Uani 1 1 d ...
C2 C -0.2285(7) 0.0445(5) 0.0570(3) 0.0289(12) Uani 1 1 d ...
C3 C -0.1527(7) 0.0174(5) 0.1313(3) 0.0301(13) Uani 1 1 d ...
C4 C -0.0839(7) -0.0095(5) 0.1954(3) 0.0290(13) Uani 1 1 d ...
C11 C -0.3618(7) 0.0880(5) -0.0896(3) 0.0257(12) Uani 1 1 d ...
C12 C -0.4466(7) 0.0376(5) -0.2248(3) 0.0350(14) Uani 1 1 d ...
```

H12 H -0.4729 -0.0079 -0.2794 0.042 Uiso 1 1 calc R . .  
C13 C -0.4657(7) 0.1675(5) -0.1979(3) 0.0331(14) Uani 1 1 d . . .  
H13 H -0.5082 0.226 -0.2316 0.04 Uiso 1 1 calc R . .  
C14 C -0.3425(9) -0.1474(5) -0.1560(4) 0.0456(17) Uani 1 1 d . . .  
H14A H -0.3336 -0.1896 -0.2129 0.068 Uiso 1 1 calc R . .  
H14B H -0.4291 -0.1935 -0.1319 0.068 Uiso 1 1 calc R . .  
H14C H -0.2381 -0.1483 -0.1224 0.068 Uiso 1 1 calc R . .  
C21 C -0.0062(6) -0.0549(4) 0.2665(3) 0.0247(12) Uani 1 1 d . . .  
C22 C 0.0972(7) -0.1947(5) 0.3456(3) 0.0303(13) Uani 1 1 d . . .  
H22 H 0.1315 -0.2709 0.3642 0.036 Uiso 1 1 calc R . .  
C23 C 0.1109(7) -0.0718(5) 0.3911(3) 0.0305(13) Uani 1 1 d . . .  
H23 H 0.1577 -0.0497 0.447 0.037 Uiso 1 1 calc R . .  
C24 C -0.0127(8) -0.2894(5) 0.1940(3) 0.0388(15) Uani 1 1 d . . .  
H24A H 0.086 -0.3008 0.1649 0.058 Uiso 1 1 calc R . .  
H24B H -0.1007 -0.2661 0.1561 0.058 Uiso 1 1 calc R . .  
H24C H -0.0466 -0.37 0.2132 0.058 Uiso 1 1 calc R . .  
C31 C -0.2753(7) 0.2680(5) 0.4119(3) 0.0280(12) Uani 1 1 d . . .  
C32 C -0.4198(7) 0.3415(5) 0.4422(4) 0.0385(14) Uani 1 1 d . . .  
H32A H -0.4247 0.4206 0.4175 0.058 Uiso 1 1 calc R . .  
H32B H -0.4052 0.3635 0.5029 0.058 Uiso 1 1 calc R . .  
H32C H -0.5219 0.2872 0.4255 0.058 Uiso 1 1 calc R . .  
C41 C 0.1878(6) 0.4301(5) 0.3324(3) 0.0232(11) Uani 1 1 d . . .  
C42 C 0.2989(8) 0.4903(5) 0.2755(3) 0.0337(13) Uani 1 1 d . . .  
H42A H 0.3228 0.5823 0.2966 0.051 Uiso 1 1 calc R . .  
H42B H 0.2435 0.4795 0.2192 0.051 Uiso 1 1 calc R . .  
H42C H 0.4013 0.4475 0.2744 0.051 Uiso 1 1 calc R . .  
C51 C 0.2205(6) 0.2859(5) 0.5539(3) 0.0253(12) Uani 1 1 d . . .  
C52 C 0.3286(7) 0.2456(5) 0.6245(3) 0.0376(14) Uani 1 1 d . . .  
H52A H 0.4426 0.2483 0.6111 0.056 Uiso 1 1 calc R . .  
H52B H 0.2927 0.1578 0.6318 0.056 Uiso 1 1 calc R . .  
H52C H 0.3201 0.3048 0.6759 0.056 Uiso 1 1 calc R . .  
C61 C -0.2172(6) 0.6081(5) -0.0299(3) 0.0240(11) Uani 1 1 d . . .  
C62 C -0.0508(7) 0.6690(5) -0.0461(4) 0.0408(15) Uani 1 1 d . . .  
H62A H -0.0411 0.7607 -0.0227 0.061 Uiso 1 1 calc R . .  
H62B H -0.0423 0.6592 -0.1061 0.061 Uiso 1 1 calc R . .  
H62C H 0.037 0.6258 -0.0198 0.061 Uiso 1 1 calc R . .  
C71 C -0.6428(6) 0.5574(5) -0.1406(3) 0.0254(12) Uani 1 1 d . . .  
C72 C -0.7324(7) 0.6002(5) -0.2173(3) 0.0339(13) Uani 1 1 d . . .  
H72A H -0.8472 0.6107 -0.2079 0.051 Uiso 1 1 calc R . .  
H72B H -0.7267 0.5348 -0.2662 0.051 Uiso 1 1 calc R . .  
H72C H -0.6803 0.6824 -0.2268 0.051 Uiso 1 1 calc R . .  
N11 N -0.4123(5) 0.1978(4) -0.1133(2) 0.0233(9) Uani 1 1 d . . .  
N12 N -0.3829(6) -0.0115(4) -0.1571(3) 0.0284(10) Uani 1 1 d . . .  
N21 N 0.0454(6) 0.0156(4) 0.3423(3) 0.0269(10) Uani 1 1 d . . .  
N22 N 0.0228(5) -0.1844(4) 0.2672(3) 0.0263(10) Uani 1 1 d . . .  
O31 O -0.1287(4) 0.3186(3) 0.4409(2) 0.0280(8) Uani 1 1 d . . .  
O32 O -0.2938(5) 0.1667(4) 0.3607(3) 0.0561(13) Uani 1 1 d . . .  
O41 O 0.1475(4) 0.5001(3) 0.3967(2) 0.0271(8) Uani 1 1 d . . .  
O42 O 0.1411(5) 0.3074(3) 0.3098(2) 0.0295(9) Uani 1 1 d . . .  
O51 O 0.1637(4) 0.3980(3) 0.5654(2) 0.0273(8) Uani 1 1 d . . .  
O52 O 0.1937(5) 0.2030(3) 0.4867(2) 0.0297(9) Uani 1 1 d . . .  
O61 O -0.2545(4) 0.4906(3) -0.0621(2) 0.0308(9) Uani 1 1 d . . .  
O62 O -0.3080(5) 0.6768(3) 0.0159(2) 0.0348(9) Uani 1 1 d . . .  
O71 O -0.5851(5) 0.4467(3) -0.1482(2) 0.0313(9) Uani 1 1 d . . .  
O72 O -0.6335(5) 0.6366(3) -0.0725(2) 0.0329(9) Uani 1 1 d . . .  
Zn1 Zn 0 0.5 0.5 0.0213(2) Uani 1 2 d S . .  
Zn2 Zn -0.46055(7) 0.37417(5) -0.04817(3) 0.02167(17) Uani 1 1 d . . .  
Zn3 Zn 0.03528(8) 0.20684(5) 0.38644(4) 0.02283(17) Uani 1 1 d . . .

loop\_

\_atom\_site\_aniso\_label  
\_atom\_site\_aniso\_U\_11  
\_atom\_site\_aniso\_U\_22  
\_atom\_site\_aniso\_U\_33  
\_atom\_site\_aniso\_U\_23  
\_atom\_site\_aniso\_U\_13  
\_atom\_site\_aniso\_U\_12

C1 0.032(3) 0.020(2) 0.031(3) 0.007(2) 0.004(3) 0.002(2)

C2 0.033(3) 0.023(2) 0.031(3) 0.004(2) 0.003(3) 0.001(2)  
C3 0.036(3) 0.024(3) 0.028(3) 0.000(2) 0.002(3) 0.002(2)  
C4 0.035(3) 0.022(3) 0.027(3) -0.003(2) 0.001(3) -0.002(2)  
C11 0.025(3) 0.027(3) 0.027(3) 0.008(2) 0.009(2) 0.002(2)  
C12 0.045(4) 0.035(3) 0.022(3) -0.006(2) 0.006(3) 0.001(3)  
C13 0.051(4) 0.029(3) 0.020(3) 0.005(2) -0.001(3) 0.008(3)  
C14 0.065(5) 0.017(3) 0.053(4) -0.002(3) 0.014(3) 0.003(3)  
C21 0.025(3) 0.023(2) 0.026(3) 0.004(2) 0.003(2) 0.001(2)  
C22 0.036(3) 0.019(2) 0.037(3) 0.008(2) 0.004(3) 0.003(2)  
C23 0.040(4) 0.027(3) 0.024(3) 0.006(2) 0.000(2) 0.002(2)  
C24 0.047(4) 0.025(3) 0.037(3) -0.009(3) -0.011(3) 0.001(3)  
C31 0.029(3) 0.029(3) 0.025(3) 0.002(2) 0.002(2) -0.002(2)  
C32 0.021(3) 0.046(3) 0.047(4) 0.001(3) 0.006(3) 0.000(2)  
C41 0.019(3) 0.028(3) 0.022(3) 0.007(2) -0.002(2) 0.000(2)  
C42 0.046(4) 0.030(3) 0.028(3) 0.010(2) 0.019(3) 0.000(2)  
C51 0.022(3) 0.027(3) 0.027(3) 0.008(2) 0.002(2) 0.001(2)  
C52 0.041(4) 0.039(3) 0.031(3) 0.003(3) -0.005(3) 0.008(3)  
C61 0.022(3) 0.030(3) 0.021(3) 0.010(2) -0.002(2) -0.004(2)  
C62 0.031(3) 0.042(3) 0.051(4) 0.011(3) 0.013(3) -0.004(3)  
C71 0.019(3) 0.029(3) 0.029(3) 0.008(2) 0.001(2) 0.001(2)  
C72 0.036(3) 0.041(3) 0.025(3) 0.004(2) 0.000(3) 0.011(3)  
N11 0.029(3) 0.023(2) 0.018(2) 0.0051(17) 0.0028(18) 0.0022(18)  
N12 0.040(3) 0.022(2) 0.023(2) 0.0014(18) 0.006(2) 0.0017(19)  
N21 0.036(3) 0.022(2) 0.022(2) 0.0011(18) 0.001(2) 0.0025(19)  
N22 0.031(3) 0.022(2) 0.024(2) 0.0021(18) 0.000(2) 0.0009(18)  
O31 0.023(2) 0.0239(17) 0.034(2) -0.0030(16) 0.0015(16) -0.0004(15)  
O32 0.045(3) 0.044(2) 0.067(3) -0.023(2) -0.005(2) -0.002(2)  
O41 0.037(2) 0.0251(17) 0.0188(18) -0.0014(15) 0.0100(16) -0.0003(15)  
O42 0.041(2) 0.0217(17) 0.0263(19) 0.0033(15) 0.0088(17) 0.0001(15)  
O51 0.029(2) 0.0248(17) 0.0259(19) 0.0000(15) -0.0037(16) 0.0039(15)  
O52 0.038(2) 0.0240(17) 0.0246(19) -0.0025(15) -0.0035(17) 0.0039(16)  
O61 0.029(2) 0.0292(19) 0.035(2) 0.0055(17) 0.0077(17) 0.0000(16)  
O62 0.031(2) 0.0330(19) 0.041(2) 0.0039(18) 0.0125(18) -0.0001(17)  
O71 0.037(2) 0.0308(19) 0.027(2) 0.0057(16) 0.0020(17) 0.0054(17)  
O72 0.043(2) 0.0347(19) 0.0218(19) 0.0040(16) 0.0021(17) 0.0112(17)  
Zn1 0.0255(5) 0.0185(4) 0.0194(4) 0.0002(3) 0.0043(3) 0.0022(3)  
Zn2 0.0249(3) 0.0189(3) 0.0213(3) 0.0020(2) 0.0039(2) 0.0033(2)  
Zn3 0.0293(4) 0.0183(3) 0.0206(3) 0.0010(2) 0.0038(3) 0.0030(2)

#-----#  
# MOLECULAR GEOMETRY #  
#-----#

\_geom\_special\_details

;

All esds (except the esd in the dihedral angle between two l.s. planes) are estimated using the full covariance matrix. The cell esds are taken into account individually in the estimation of esds in distances, angles and torsion angles; correlations between esds in cell parameters are only used when they are defined by crystal symmetry. An approximate (isotropic) treatment of cell esds is used for estimating esds involving l.s. planes.

;

loop\_

\_geom\_bond\_atom\_site\_label\_1  
\_geom\_bond\_atom\_site\_label\_2  
\_geom\_bond\_distance  
\_geom\_bond\_site\_symmetry\_2  
\_geom\_bond\_publ\_flag

C1 C2 1.193(7) . ?  
C1 C11 1.420(7) . ?  
C2 C3 1.365(8) . ?  
C3 C4 1.202(7) . ?  
C4 C21 1.407(7) . ?  
C11 N11 1.323(6) . ?  
C11 N12 1.366(6) . ?  
C12 N12 1.340(7) . ?  
C12 C13 1.366(7) . ?

C13 N11 1.369(6) . ?  
C14 N12 1.460(6) . ?  
C21 N21 1.338(6) . ?  
C21 N22 1.371(6) . ?  
C22 C23 1.357(6) . ?  
C22 N22 1.367(6) . ?  
C23 N21 1.379(6) . ?  
C24 N22 1.467(6) . ?  
C31 O32 1.221(5) . ?  
C31 O31 1.281(6) . ?  
C31 C32 1.503(7) . ?  
C41 O41 1.245(5) . ?  
C41 O42 1.286(5) . ?  
C41 C42 1.501(7) . ?  
C51 O51 1.263(6) . ?  
C51 O52 1.264(5) . ?  
C51 C52 1.493(7) . ?  
C61 O61 1.251(5) . ?  
C61 O62 1.255(6) . ?  
C61 C62 1.503(7) . ?  
C71 O71 1.252(6) . ?  
C71 O72 1.255(5) . ?  
C71 C72 1.510(7) . ?  
N11 Zn2 2.034(4) . ?  
N21 Zn3 2.002(4) . ?  
O31 Zn3 1.980(3) . ?  
O31 Zn1 2.129(3) . ?  
O32 Zn3 2.645(4) . ?  
O41 Zn1 2.118(3) . ?  
O42 Zn3 1.938(4) . ?  
O51 Zn1 2.052(3) . ?  
O52 Zn3 1.971(3) . ?  
O61 Zn2 2.035(3) . ?  
O62 Zn2 2.036(4) 2\_465 ?  
O71 Zn2 2.077(4) . ?  
O72 Zn2 2.036(3) 2\_465 ?  
Zn1 O51 2.052(3) 2\_566 ?  
Zn1 O41 2.118(3) 2\_566 ?  
Zn1 O31 2.129(3) 2\_566 ?  
Zn1 Zn3 3.3287(6) . ?  
Zn2 O62 2.036(4) 2\_465 ?  
Zn2 O72 2.036(3) 2\_465 ?  
Zn2 Zn2 2.9489(10) 2\_465 ?

loop\_

\_geom\_angle\_atom\_site\_label\_1  
\_geom\_angle\_atom\_site\_label\_2  
\_geom\_angle\_atom\_site\_label\_3  
\_geom\_angle  
\_geom\_angle\_site\_symmetry\_1  
\_geom\_angle\_site\_symmetry\_3  
\_geom\_angle\_publ\_flag  
C2 C1 C11 175.6(5) . . ?  
C1 C2 C3 178.9(6) . . ?  
C4 C3 C2 178.1(6) . . ?  
C3 C4 C21 174.0(5) . . ?  
N11 C11 N12 109.9(4) . . ?  
N11 C11 C1 128.4(4) . . ?  
N12 C11 C1 121.6(4) . . ?  
N12 C12 C13 106.8(4) . . ?  
C12 C13 N11 109.2(5) . . ?  
N21 C21 N22 109.7(4) . . ?  
N21 C21 C4 127.3(4) . . ?  
N22 C21 C4 122.9(4) . . ?  
C23 C22 N22 106.4(4) . . ?  
C22 C23 N21 110.0(4) . . ?  
O32 C31 O31 120.5(5) . . ?  
O32 C31 C32 122.7(5) . . ?

O31 C31 C32 116.8(4) . . ?  
O41 C41 O42 124.9(5) . . ?  
O41 C41 C42 119.1(4) . . ?  
O42 C41 C42 116.0(4) . . ?  
O51 C51 O52 125.4(5) . . ?  
O51 C51 C52 118.4(4) . . ?  
O52 C51 C52 116.1(4) . . ?  
O61 C61 O62 124.3(5) . . ?  
O61 C61 C62 117.3(5) . . ?  
O62 C61 C62 118.4(4) . . ?  
O71 C71 O72 124.6(5) . . ?  
O71 C71 C72 118.9(4) . . ?  
O72 C71 C72 116.5(4) . . ?  
C11 N11 C13 106.2(4) . . ?  
C11 N11 Zn2 133.3(3) . . ?  
C13 N11 Zn2 119.3(3) . . ?  
C12 N12 C11 107.9(4) . . ?  
C12 N12 C14 126.0(4) . . ?  
C11 N12 C14 126.1(5) . . ?  
C21 N21 C23 106.0(4) . . ?  
C21 N21 Zn3 131.1(3) . . ?  
C23 N21 Zn3 122.9(3) . . ?  
C22 N22 C21 107.8(4) . . ?  
C22 N22 C24 127.3(4) . . ?  
C21 N22 C24 124.8(4) . . ?  
C31 O31 Zn3 108.0(3) . . ?  
C31 O31 Zn1 141.3(3) . . ?  
Zn3 O31 Zn1 108.16(16) . . ?  
C31 O32 Zn3 77.8(3) . . ?  
C41 O41 Zn1 143.2(3) . . ?  
C41 O42 Zn3 121.1(3) . . ?  
C51 O51 Zn1 136.6(3) . . ?  
C51 O52 Zn3 128.7(3) . . ?  
C61 O61 Zn2 128.1(3) . . ?  
C61 O62 Zn2 128.2(3) . 2\_465 ?  
C71 O71 Zn2 123.2(3) . . ?  
C71 O72 Zn2 132.8(3) . 2\_465 ?  
O51 Zn1 O51 180.00(16) 2\_566 . ?  
O51 Zn1 O41 86.43(14) 2\_566 . ?  
O51 Zn1 O41 93.57(14) . . ?  
O51 Zn1 O41 93.57(14) 2\_566 2\_566 ?  
O51 Zn1 O41 86.43(14) . 2\_566 ?  
O41 Zn1 O41 180.0000(10) . 2\_566 ?  
O51 Zn1 O31 90.50(13) 2\_566 . ?  
O51 Zn1 O31 89.50(13) . . ?  
O41 Zn1 O31 90.54(13) . . ?  
O41 Zn1 O31 89.46(13) 2\_566 . ?  
O51 Zn1 O31 89.50(13) 2\_566 2\_566 ?  
O51 Zn1 O31 90.50(13) . 2\_566 ?  
O41 Zn1 O31 89.46(13) . 2\_566 ?  
O41 Zn1 O31 90.54(13) 2\_566 2\_566 ?  
O31 Zn1 O31 180.00(18) . 2\_566 ?  
O51 Zn1 Zn3 109.54(8) 2\_566 . ?  
O51 Zn1 Zn3 70.46(8) . . ?  
O41 Zn1 Zn3 64.42(8) . . ?  
O41 Zn1 Zn3 115.58(8) 2\_566 . ?  
O31 Zn1 Zn3 34.41(9) . . ?  
O31 Zn1 Zn3 145.59(9) 2\_566 . ?  
N11 Zn2 O61 102.06(15) . . ?  
N11 Zn2 O62 98.77(15) . 2\_465 ?  
O61 Zn2 O62 158.97(14) . 2\_465 ?  
N11 Zn2 O72 102.81(15) . 2\_465 ?  
O61 Zn2 O72 89.47(15) . 2\_465 ?  
O62 Zn2 O72 88.74(16) 2\_465 2\_465 ?  
N11 Zn2 O71 97.71(14) . . ?  
O61 Zn2 O71 88.53(15) . . ?  
O62 Zn2 O71 85.82(15) 2\_465 . ?  
O72 Zn2 O71 159.35(14) 2\_465 . ?

N11 Zn2 Zn2 178.24(12) . 2\_465 ?  
O61 Zn2 Zn2 79.68(10) . 2\_465 ?  
O62 Zn2 Zn2 79.51(10) 2\_465 2\_465 ?  
O72 Zn2 Zn2 76.86(10) 2\_465 2\_465 ?  
O71 Zn2 Zn2 82.56(9) . 2\_465 ?  
O42 Zn3 O52 108.98(16) . . ?  
O42 Zn3 O31 106.70(15) . . ?  
O52 Zn3 O31 99.03(14) . . ?  
O42 Zn3 N21 108.03(16) . . ?  
O52 Zn3 N21 93.80(15) . . ?  
O31 Zn3 N21 136.42(16) . . ?  
O42 Zn3 O32 116.02(16) . . ?  
O52 Zn3 O32 132.16(16) . . ?  
O31 Zn3 O32 53.72(12) . . ?  
N21 Zn3 O32 87.35(15) . . ?  
O42 Zn3 Zn1 84.41(9) . . ?  
O52 Zn3 Zn1 78.36(9) . . ?  
O31 Zn3 Zn1 37.43(9) . . ?  
N21 Zn3 Zn1 167.06(12) . . ?  
O32 Zn3 Zn1 90.35(8) . . ?
